# Supplementary material for: Understanding Marketing Responses to a Tax on Sugary Drinks: A Qualitative Interview Study in the United Kingdom, 2019
Source: PubMed Central journal article supplement (PMC9818127; doi:10.34172/ijhpm.2022.5465), 2022-02-23
Supplement: ijhpm-11-2618-s001.pdf [file ijhpm-11-2618-s001.pdf]

**Article title:** Understanding Marketing Responses to a Tax on Sugary Drinks: A Qualitative Interview Study in the United Kingdom, 2019

**Journal name:** International Journal of Health Policy and Management (IJHPM)

**Authors' information:** Hannah Forde<sup>1\*</sup>, Tarra L. Penney<sup>2,1</sup>, Martin White<sup>1</sup>, Louis Levy<sup>3,4</sup>, Felix Greaves<sup>5,6,4</sup>, Jean Adams<sup>1</sup>

<sup>1</sup>MRC Epidemiology Unit, University of Cambridge School of Clinical Medicine, Institute of Metabolic Science, Cambridge, UK.

<sup>2</sup>Global Food Systems and Policy Research, School of Global Health, Faculty of Health, York University, Toronto, ON, Canada.

<sup>3</sup>The Faculty of Health and Social Care, University of Chester, Chester, UK.

<sup>4</sup>Public Health England, London, UK.

<sup>5</sup>Department of Primary Care and Public Health, School of Public Health, Imperial College London, London, UK. <sup>6</sup>National Institute for Health and Care Excellence, London, UK.

(\*Corresponding author: [hf332@medschl.cam.ac.uk](mailto:hf332@medschl.cam.ac.uk))

**Supplementary file 1.** Coreq (Consolidated Criteria For Reporting Qualitative Research) Checklist.

| Topic                                          | Item no. | Guide question/description                                                                                                                | Page       |
|------------------------------------------------|----------|-------------------------------------------------------------------------------------------------------------------------------------------|------------|
| <b>Domain 1: Research team and reflexivity</b> |          |                                                                                                                                           |            |
| <i>Personal characteristics</i>                |          |                                                                                                                                           |            |
| Interviewer/facilitator                        | 1        | Which author/s conducted the interview or focus group?                                                                                    | 3          |
| Credentials                                    | 2        | What were the researcher's credentials? E.g. PhD, MD                                                                                      | Title page |
| Occupation                                     | 3        | What was their occupation at the time of study?                                                                                           | Title page |
| Gender                                         | 4        | Was the researcher male or female?                                                                                                        | N/A        |
| Experience and training                        | 5        | What experience or training did the researcher have?                                                                                      | 4          |
| <i>Relationship with participants</i>          |          |                                                                                                                                           |            |
| Relationship established                       | 6        | Was a relationship established prior to study commencement?                                                                               | 3          |
| Participant knowledge of the interviewer       | 7        | What did the participants know about the researcher? e.g. personal goals, reasons for doing the research                                  | 3          |
| Interviewer characteristics                    | 8        | What characteristics were reported about the interviewer/facilitator? E.g. bias, assumptions, reasons and interests in the research topic | 3          |

| <b>Domain 2: Study design</b>          |    |                                                                                                                                                          |     |
|----------------------------------------|----|----------------------------------------------------------------------------------------------------------------------------------------------------------|-----|
| <i>Theoretical framework</i>           |    |                                                                                                                                                          |     |
| Methodological orientation and Theory  | 9  | What methodological orientation was stated to underpin the study? e.g. grounded theory, discourse analysis, ethnography, phenomenology, content analysis | 2   |
| <i>Participant selection</i>           |    |                                                                                                                                                          |     |
| Sampling                               | 10 | How were participants selected? e.g. purposive, convenience, consecutive, snowball                                                                       | 2   |
| Method of approach                     | 11 | How were participants approached? e.g. face-to-face, telephone, mail, email                                                                              | 2   |
| Sample size                            | 12 | How many participants were in the study?                                                                                                                 | 4   |
| Non-participation                      | 13 | How many participants refused to participate or dropped out? Reasons?                                                                                    | 4   |
| <i>Setting</i>                         |    |                                                                                                                                                          |     |
| Setting of data collection             | 14 | Where was the data collected? e.g. home, clinic, workplace                                                                                               | 3   |
| Presence of non-participants           | 15 | Was anyone else present besides the participants and researchers?                                                                                        | 3   |
| Description of sample                  | 16 | What are the important characteristics of the sample? e.g. demographic, data, date                                                                       | 4   |
| <i>Data collection</i>                 |    |                                                                                                                                                          |     |
| Interview guide                        | 17 | Were questions, prompts, guides provided by the authors? Was it pilot tested?                                                                            | 3   |
| Repeat interviews                      | 18 | Were repeat interviews carried out? If yes, how many?                                                                                                    | N/A |
| Audio/visual recording                 | 19 | Did the research use audio or visual recording to collect the data?                                                                                      | 3   |
| Field notes                            | 20 | Were field notes made during and/or after the interview or focus group?                                                                                  | 3   |
| Duration                               | 21 | What was the duration of the interviews or focus groups?                                                                                                 | 4   |
| Data saturation                        | 22 | Was data saturation discussed?                                                                                                                           | 2   |
| Transcripts returned                   | 23 | Were transcriptions returned to participants for comment and/or correction?                                                                              | 4   |
| <b>Domain 3: analysis and findings</b> |    |                                                                                                                                                          |     |
| <i>Data analysis</i>                   |    |                                                                                                                                                          |     |
| Number of data coders                  | 24 | How many data coders coded the data?                                                                                                                     | 4   |
| Description of the coding tree         | 25 | Did authors provide description of the coding tree?                                                                                                      | 5   |

|                              |    |                                                                                                                                 |     |
|------------------------------|----|---------------------------------------------------------------------------------------------------------------------------------|-----|
| Derivation of themes         | 26 | Were themes identified in advance or derived from the data?                                                                     | 3-4 |
| Software                     | 27 | What software, if applicable, was used to manage the data?                                                                      | 4   |
| Participant checking         | 28 | Did participants provide feedback on the findings?                                                                              | 4   |
| <i>Reporting</i>             |    |                                                                                                                                 |     |
| Quotations presented         | 29 | Were participant quotations presented to illustrate the themes/findings? Was each quotation identified? e.g. participant number | 5   |
| Data and findings consistent | 30 | Was there consistency between the data presented and the findings?                                                              | 5-8 |
| Clarity of major themes      | 31 | Were major themes clearly presented in the findings?                                                                            | 5-8 |
| Clarity of minor themes      | 32 | Is there a description of diverse cases or discussion of minor themes?                                                          | 8   |

Developed from: Tong A, Sainsbury P, Craig J. Consolidated criteria for reporting qualitative research (COREQ): a 32-item checklist for interviews and focus groups. *International Journal for Quality in Health Care*. 2007. Volume 19, Number 6: pp. 349 – 357
